# Supplementary material for: Tc-MYBPA an Arabidopsis TT2-like transcription factor and functions in the regulation of proanthocyanidin synthesis in Theobroma cacao
Source: PubMed Central journal article supplement (PMC4481123; doi:10.1186/s12870-015-0529-y), 2015-06-25
Supplement: 12870_2015_529_MOESM1_ESM.pdf [file 12870_2015_529_MOESM1_ESM.pdf]

## Blast results by querying AtTT2 to cacao genome

| Sequences producing significant alignments:       | (bits) | Value |
|---------------------------------------------------|--------|-------|
| Tc00_g016740 GHMYB10                              | 199    | 2e-51 |
| Tc09_g007160 MybPA2                               | 194    | 9e-50 |
| Tc09_g005570 Putative GHMYB10                     | 191    | 4e-49 |
| Tc09_g005580 Putative Transcription factor MYB558 | 191    | 6e-49 |
| Tc01_g029340 Putative uncharacterized protein     | 189    | 1e-48 |
| Tc01_g004300 Putative MybPA2                      | 189    | 3e-48 |
| Tc02_g026610 Putative uncharacterized protein     | 188    | 3e-48 |
| Tc01_g034240 TT2 like MYB transcriptoin factor    | 168    | 5e-42 |
| Tc09_g005590 Putative uncharacterized protein     | 167    | 6e-42 |
| Tc02_g027560 Transcription repressor MYB4         | 167    | 1e-41 |

>Tc00\_t016740

MGRNPCCSKEGLNRGAWTAHEDKILTQYIKAHGEGSWRNLPKRAGLKRKCGKSCRLRWLNLYLRPDIKRGNISADEEELIIRLH  
KLLGNRWSLIAGRLPGRTDNEIKNYWNTNLGKKVQHHQNPSSAAPGHNKSNRGRVTRKREQLATAAGTPSSHVVRTRAIRC  
VFINPHQKIEPFDRNREAKPSIDGECRPMQTQSAPSPIKALSENEDQNVHNKPFDFMVDNMGFECLSELLNSDFSDLVGLN  
YSNDSNAISPSSDQPLIFSEEILQDWTSSHHAQQNVASNPVSLASFLDYGEEWLAE

### alignment with top EST contig hit

>[CL1309Contig1](#)

Length = 1392

Score = 202 bits (515), Expect = 2e-52, Method: Compositional matrix adjust.  
Identities = 90/116 (77%), Positives = 104/116 (89%)  
Frame = -1

Query: 1 MGRNPCCSKEGLNRGAWTAHEDKILTQYIKAHGEGSWRNLPKRAGLKRKCGKSCRLRWLNLY 60  
MGR PCCSK GL+RG WT ED +L +YI+AHG+G WR+LPK+AGL RCGKSCRLRW+NY  
Sbjct: 1167 MGRAPCCSKVGLHRGPWTPREDTLLVKYIQAHGDGHWRS LPKKAGLLRCGKSCRLRWMNY 988

Query: 61 LRPDIKRGNISADEEELIIRLHKLLGNRWSLIAGRLPGRTDNEIKNYWNTNLGKKV 116  
LRPDIKRGNI+ DE++LIIRLH LLGNRWSLIAGRLPGRTDNEIKNYWNT+L K++  
Sbjct: 987 LRPDIKRGNITPDEDDLIIRLHSLGNRWSLIAGRLPGRTDNEIKNYWNTLHLSKRL 820

>Tc09\_t007160

MGRKPCCAKVGLNRGAWSAKEDKILTNYIKIHGEGKWRDLRQAGLKRKCGKSCRLRWLNLYLRPDIKRGNISSEEEELIVRLH  
KLLGNRWSLIAGRLPGRTDNEIKNYWNTNLSKRVQGNKNTPKGTQTSNMQLNKLKLGCIKSSOMEITTAEHKVIKAVK  
CTKAVNVNPHLSDCQTAENNSVPKSESTTASESPSSSAINEDNSMDFLIDFDINELLVSDAPMSDLHQTQQVDENGENVVD  
NWECRNGFNLNIDVELYSSVDELARPDNWRPSTDLFQTSETLDLLSLASYLNLEN

### alignment with top EST contig hit

>[CL1309Contig1](#)

Length = 1392

Score = 211 bits (538), Expect = 4e-55, Method: Compositional matrix adjust.  
Identities = 96/135 (71%), Positives = 112/135 (82%)  
Frame = -1

Query: 1 MGRRPCCSKEGMNRGAWTLTEDKILTQYIKAHGEGKWRNIPKEAGLKRKCGKSCRLRWMNY 60  
MGR PCCSK G++RG WT ED +L Y++ HG+G WR++PK+AGL RCGKSCRLRWMNY  
Sbjct: 1167 MGRAPCCSKVGLHRGPWTPREDTLLVKYIQAHGDGHWRS LPKKAGLLRCGKSCRLRWMNY 988

Query: 61 LRPDIKRGNISADEEELIIRLHKLLGNRWSLIAGRLPGRTDNEIKNYWNTLHLSKRGQKE 120  
LRPDIKRGNI+PDE+DLIIRLH LLGNRWSLIAGRLPGRTDNEIKNYWNTLHLSKR +  
Sbjct: 987 LRPDIKRGNITPDEDDLIIRLHSLGNRWSLIAGRLPGRTDNEIKNYWNTLHLSKRLLSQG 808

Query: 121 RGPKNHSHKVGKKPI 135

P + H K+ + P+

Sbjct: 807 TDPNT-HKKLSEPPV 766

>Tc09\_t005570

MGRRPCCSKEGMNRGAWTLTEDKILTDYVKVHGEKWRNIPKEAGLKRCGKSCRLRWMNYLRPDIKRGNISPDEEDLIIRLH  
KLLGNRWSLIAGRLPGRTDNEIKNYWNTHLSKRGQKGERGPKSNHSGVGGKPIITVKVDEDLVSSRVIRTKALRFKEVFITPD  
AQQHRIENHHRNVAIPPSMDPNLVQNPAGSESSDRSLITLSSNEEYPVDFMVDISAGEISVPEIFASDFTSFSDHDLGASEM  
DKVMRGDDADNYMSKIAPSQAFLPEEMEQNWSGSDYYIQANLDSDFGSLTAFLESAAEWLI

**alignment with top EST contig hit**

>[CL1309Contig1](#)

Length = 1392

Score = 211 bits (538), Expect = 4e-55, Method: Compositional matrix adjust.  
Identities = 96/135 (71%), Positives = 112/135 (82%)  
Frame = -1

Query: 1 MGRRPCCSKEGMNRGAWTLTEDKILTDYVKVHGEKWRNIPKEAGLKRCGKSCRLRWMNY 60  
MGR PCCSK G++RG WT ED +L Y++ HG+G WR++PK+AGL RCGKSCRLRWMNY  
Sbjct: 1167 MGRAPCCSKVGLHRGPWTPREDTLLVKYIQAHGDGHWRS LPKAGLLRCGKSCRLRWMNY 988  
Query: 61 LRPDIKRGNISPDEEDLIIRLHKLGNRWSLIAGRLPGRTDNEIKNYWNTHLSKRGQKKE 120  
LRPDIKRGNI+PDE+DLIIRLH LLGNRWSLIAGRLPGRTDNEIKNYWNTHLSKR +  
Sbjct: 987 LRPDIKRGNITPDEEDLIIRLHSLGNRWSLIAGRLPGRTDNEIKNYWNTHLSKRLLSQG 808  
Query: 121 RGPKSNHSGVGGKPI 135  
P + H K+ + P+  
Sbjct: 807 TDPNT-HKKLSEPPV 766

>Tc09\_t005580

MGRKPCCSKEGLNRGAWSAIEDQILIDYIKTNGEGKVGWGNIPKKAGLKRCGKSCRLRWLNLYLRPDIKRGNISQEEEDLIIRLH  
KLLGNRWSLIAGRIPGRTDNEIKNYWNSTLGKVKKAEQAKQSKDDLKAKIQPLAETPOSTALRTKASKCSTCLVTQEAAYKA  
EIIDADLVHDARLEPPKSEGTLTSTISEEAHSVNSALEFDIGELLASDISDSEFWNCCQVNNTSMEEAESSGVARNMWSLSE  
QHLQFSEEMLTDWIRDDI

**alignment with the top contig hit**

>[CL2621Contig1](#)

Length = 1332

Score = 201 bits (511), Expect = 4e-52, Method: Compositional matrix adjust.  
Identities = 98/185 (52%), Positives = 128/185 (69%), Gaps = 15/185 (8%)  
Frame = -1

Query: 3 RKPCCSKEGLNRGAWSAIEDQILIDYIKTNGEGKVGWGNIPKKAGLKRCGKSCRLRWLNLYLR 62  
RKPCCK+G N+GAWS EDQ LIDYI+T+GEG W ++PK AGL RCGKSCRLRW+NYLR  
Sbjct: 1224 RKPCCDKQGTNKGAWSKQEDQKLIDYIRTHGEGCWRS LPKAAGLHRCGKSCRLRWLNLYLR 1045  
Query: 63 PDIKRGNISQEEEDLIIRLHKLGNRWSLIAGRIPGRTDNEIKNYWNSTLGKVKKAEQAK 122  
PDIKRGNI+Q+EEEDLII+LH LLGNRWSLIAGR+PGRTDNE+KNYWNST + +K+  
Sbjct: 1044 PDIKRGNFAQDEEDLIIKLHALLGNRWSLIAGRLPGRTDNEVKNYWNSTHIKRLIKLIGID 865  
Query: 123 QSKDDLKAKIQP-----LAETP-QSTALRTKASKCSTCLVTQEAAYKAEII 167  
+ L + ++P +A P +S+A + + S ++CL + + + +  
Sbjct: 864 PNNHKLNYPLRPQPQHVSPSSPASLNVARKPRRSSAAKDRVSDAASCLEDERSGRVSKL 685  
Query: 168 DADLV 172  
D DL  
Sbjct: 684 DLDLT 670

>Tc01\_t029340

MWMRRVAGGNHRMFLIFGWQTGSKTSMCLCSSFRTSIKTGNSDPIHWETTANFRLGVCTFSYIQTPAONTGRDTIEQQQMGRK  
PCCSKEEGLNRGAWTATEDKILTLDYIKARGEKGRSIPKAAGLKRCEKSCRLRWLNLYLRPGIKRGNITRDEEDLIIRLHKLL  
GNRWSLIAGRLPGRTDNEIKNYWNTVLSKRAQVKKFDHTNKDETKQRFISWSKKAPTSSGVIQAKAGRCTKVFTTPQQQVIG  
RGENNNIARTAPSTDAKFVHETAVESGFSDGSFTLLSSKEENPSISKFAMDFDIGDINISEALASDFAQLGDFELRDINSVI  
YEYGTNDCGQALLSAEGMVGNWSGNDVCVEANLDSDFGLAAFLGSAEL

**alignment with the top EST contig hit**

>[CL1309Contig1](#)

Length = 1392

Score = 196 bits (498), Expect = 2e-50, Method: Compositional matrix adjust.  
Identities = 95/151 (62%), Positives = 111/151 (73%)  
Frame = -1

Query: 74 IEQQQMGRKPCCSKEEGLNRGAWTATEDKILTLDYIKARGEKGRSIPKAAGLKRCEKSCR 133  
+ ++ MGR PCCSK GL+RG WT ED +L YI+A G+G WRS+PK AGL RC KSCR  
Sbjct: 1182 LRERGMGRAPCCSKV-GLHRGPWTPREDTLLVKYIQAHGDGHWRS LPKKAGLLRCGKSCR 1006

Query: 134 LRWLNLYLRPGIKRGNITRDEEDLIIRLHKLLGNRWSLIAGRLPGRTDNEIKNYWNTVLSK 193  
LRW+NYLRP IKRGNIT DE+DLIIRLH LLGNRWSLIAGRLPGRTDNEIKNYWNT LSK  
Sbjct: 1005 LRWMNYLRPDIKRNITPDEDDLIIRLHSLGNRWSLIAGRLPGRTDNEIKNYWNT HLSK 826

Query: 194 RAQVKKFDHTNKDETKQRFISWSKKAPTSSG 224  
R + D + + + +K +S G  
Sbjct: 825 RLLSQGTDPNTHKKLSEPPVQQVEKRKSSRG 733

>Tc01\_t004300

MGRKPCCLKEGVNKGAWSAQEDKILTNYIELHGEKGNWNTLPQKAGIRLNRCGKSCRLRWNYLRPGIKRGNISPDEEDLIIR  
LHRLGNRWSLIAGRLPGRTDNEIKNYWNSVLSKKNLGDASKPPNRQCECEGKESVEKYRSGSTPNVIAPKARRCTGTLLISL  
VKG NHLPNPCLASSTPADDEL TLESQKDDVQMPNVEDEALIDSELYMPNTLDYLD FSQTRIEDMFENGMHSEELAPMLEM  
ELENLTSLGLLEDEWRELDVEND

**alignment with the top EST contig hit**

>[CL1309Contig1](#)

Length = 1392

Score = 191 bits (486), Expect = 4e-49, Method: Compositional matrix adjust.  
Identities = 88/125 (70%), Positives = 103/125 (82%)  
Frame = -1

Query: 1 MGRKPCCLKEGVNKGAWSAQEDKILTNYIELHGEKGNWNTLPQKAGIRLNRCGKSCRLRWM 60  
MGR PCC K G+++G W+ +ED +L YI+ HG+G W +LP+KAG L RCGKSCRLRWM  
Sbjct: 1167 MGRAPCCSKVGLHRGPWTPREDTLLVKYIQAHGDGHWRS LPKKAG--LLRCGKSCRLRWM 994

Query: 61 NYLRPGIKRGNISPDEEDLIIRLHRLGNRWSLIAGRLPGRTDNEIKNYWNSVLSKKNLNG 120  
NYLRP IKRGNIT+PDE+DLIIRLH LLGNRWSLIAGRLPGRTDNEIKNYWN+ LSK+L  
Sbjct: 993 NYLRPDIKRNITPDEDDLIIRLHSLGNRWSLIAGRLPGRTDNEIKNYWNT HLSKRLLS 814

Query: 121 DASKP 125  
+ P  
Sbjct: 813 QGTDP 799

>Tc02\_t026610

MGRKPCCSQEEGLNRGTWTATEDKILTEYIKAHGEGKWSIPKAAGLKRCGKSCRLRWLNYPDIKRGNITRDEEDLIIRL  
HKLLGNRWSLIAGRLPGRDNEIKNYWNSVLSKRAQVKEFDHTNKDEKKQRFISCSRKAPTSSGVIHAKAGRCTKVSFSPQQ  
KVTGEDDNTIVRTAPSMDVELVHDTAVVSGSSDGSFTLLSSKEENPSISRFAAMDFDIGESSIPEALASDFSQLSDFDFCDI  
NTVIYEYGTGDNGQALVSLGEMVGNWSGNGLVDANLDSDFGFLAGFLES DGDLTI

**alignment with the top EST contig hit**

>[CL1309Contig1](#)

Length = 1392

Score = 202 bits (513), Expect = 3e-52, Method: Compositional matrix adjust.  
Identities = 92/116 (79%), Positives = 102/116 (87%)  
Frame = -1

Query: 1 MGRKPCCSQEEGLNRGTWTATEDKILTEYIKAHGEGKWSIPKAAGLKRCGKSCRLRWLN 60  
MGR PCCS+ GL+RG WT ED +L +YI+AHG+G WRS+PK AGL RCGKSCRLRW+N  
Sbjct: 1167 MGRAPCCSKV-GLHRGPWTPREDTLLVKYIQAHGDGHWRSLPKKAGLLRCGKSCRLRWLN 991

Query: 61 YLRPDIKRGNITRDEEDLIIRLHKLLGNRWSLIAGRLPGRDNEIKNYWNSVLSKR 116  
YLRPDIKRGNIT DE+DLIIRLH LLGNRWSLIAGRLPGRDNEIKNYWN+ LSKR  
Sbjct: 990 YLRPDIKRGNITPDEDDLIIRLHSLGNRWSLIAGRLPGRDNEIKNYWNTHLSKR 823

>Tc01\_t034240

MGRAPCCSKVGLHRGPWTPREDTLLVKYIQAHGDGHWRSLPKKAGLLRCGKSCRLRWLNYPDIKRGNITPDEDDLIIRLH  
SLLGNRWSLIAGRLPGRDNEIKNYWNTHLSKRLLSQGTDPNTHKKLSEPAVQQVKKRKS SRGNSNKKQNSKKGKAKVEPE  
KPKVHLPKPVVTSFSLPRNDSFDQCNTFSTVSSSQGEGGLGTEVVQGPWSDNVNDDENGTFGLAAYDDHGFVNGSDFECQ  
SHVPASDDDNSLEKLYEEYLQLLKTNDQVQLDSFAESLLI

**alignment with the top EST contig hit**

>[CL1309Contig1](#)

Length = 1392

Score = 514 bits (1325), Expect = e-146, Method: Compositional matrix adjust.  
Identities = 252/287 (87%), Positives = 252/287 (87%)  
Frame = -1

Query: 1 MGRAPCCSKVGLHRGPWTPREDTLLVKYIQAHGDGHWRSLPKKAGLLRCGKSCRLRWLN 60  
MGRAPCCSKVGLHRGPWTPREDTLLVKYIQAHGDGHWRSLPKKAGLLRCGKSCRLRWLN  
Sbjct: 1167 MGRAPCCSKVGLHRGPWTPREDTLLVKYIQAHGDGHWRSLPKKAGLLRCGKSCRLRWLN 988

Query: 61 LRPDIKRGNITPDEDDLIIRLHSLGNRWSLIAGRLPGRDNEIKNYWNTHLSKRLLSQG 120  
LRPDIKRGNITPDEDDLIIRLHSLGNRWSLIAGRLPGRDNEIKNYWNTHLSKRLLSQG  
Sbjct: 987 LRPDIKRGNITPDEDDLIIRLHSLGNRWSLIAGRLPGRDNEIKNYWNTHLSKRLLSQG 808

Query: 121 TDPNTHKKLSEPAVQQVXXXXXXXXXXXXXXXXXXXXXXXXAKVEPEKPKVHLPKPVVTSFS 180  
TDPNTHKKLSEP VQQV AKVEPEKPKVHLPKPVVTSFS  
Sbjct: 807 TDPNTHKKLSEPPVQQVEKRRKSSRGNSNKKQNSKKGKAKVEPEKPKVHLPKPVVTSFS 628

Query: 181 LPRNDSFDQCNTFSTVSSSQGEGGLGTEVVQGPWSDNVNDDENGTFGLAAYDDHGFVNG 240  
LPRNDSFDQCNTFSTVSSSQGEGGLGTEVVQGPWSDNVNDDENGTFGLAAYDDHGFVNG  
Sbjct: 627 LPRNDSFDQCNTFSTVSSSQGEGGLGTEVVQGPWSDNVNDDENGTFGLAAYDDHGFVNG 448

Query: 241 SDFECQSHVPASDDDNSXXXXXXXXXXXXXXXXTNDQVQLDSFAESLLI 287  
SDFECQSHVPASDDDNS TNDQVQLDSFAESLLI  
Sbjct: 447 SDFECQSHVPASDDDNSLEKLYEEYLQLLKTNDQVQLDSFAESLLI 307

**Supplemental Figure S1.** Sequence analysis of other putative cacao TT2 like genes

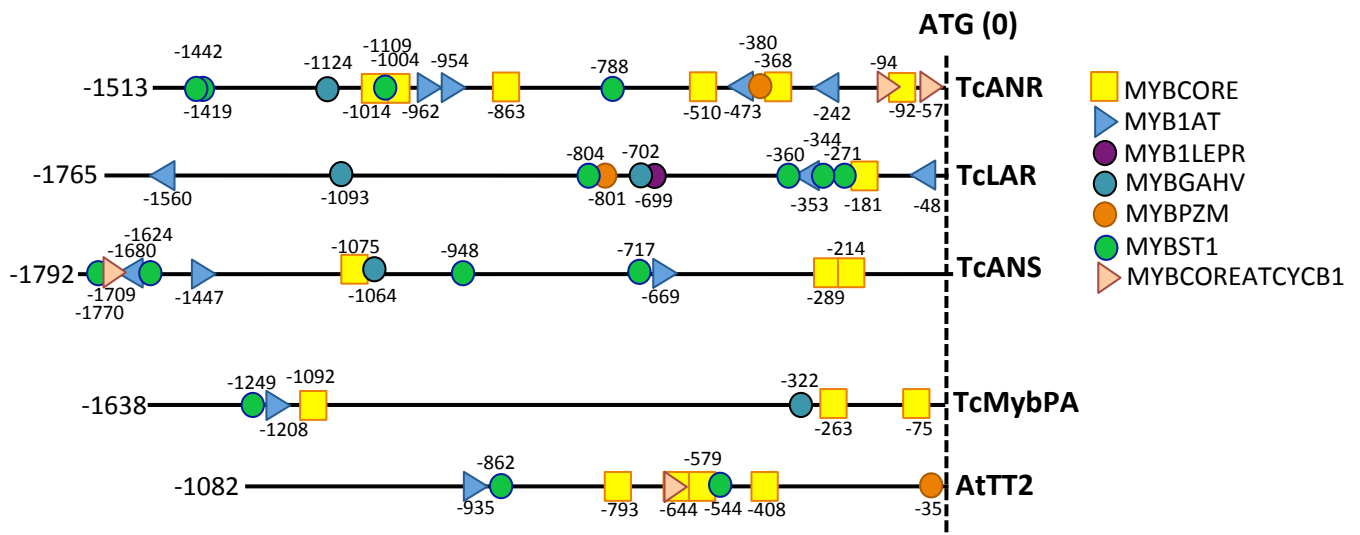

**Supplemental Figure S2.** MYB-binding motifs in the promoters of cacao PA synthesis genes, *TcANR*, *TcLAR*, *TcANS*, transcription factor *TcMybPA* and Arabidopsis *AtTT2* detected using the PLACE database (<http://www.dna.affrc.go.jp/PLACE/signalup.html>).
